# Supplementary material for: Trends in hydroclimate extremes: how changes in winter affect water storage and baseflow
Source: Copernicus journal article supplement (doi:10.5194/hess-29-4055-2025), 2025-09-03
Supplement: Supplementary file 1 [file hess-29-4055-2025-supplement.pdf]

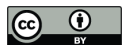

*Supplement of*

## **Trends in hydroclimate extremes: how changes in winter affect water storage and baseflow**

**Tejshree Tiwari and Hjalmar Laudon**

*Correspondence to:* Tejshree Tiwari ([tejshree.tiwari@slu.se](mailto:tejshree.tiwari@slu.se))

The copyright of individual parts of the supplement might differ from the article licence.

5

## Content of this File

10

### Tables

1. Table S1 Average annual temperature (T), Total precipitation (P mm yr<sup>-1</sup>) and Total runoff (Q mm yr<sup>-1</sup>) from the Krycklan catchment showing variability using standard deviation (std) and annual average minimum (Tmin) and maximum (Tmax) temperatures.
2. Table S2 Table showing the coefficient of determination (r<sup>2</sup>) between climate extreme indices and winter minimum Q (W\_Qmin) and Summer minimum Q (S\_Qmin). For the winter Qmin, we can see that AFDD had the highest r<sup>2</sup> (0.63) as identified by the stepwise linear regression model. For the summer Qmin, the strongest r<sup>2</sup> can be seen with summer max temperature MaxTMax (-0.56) and winter AFDD<0 (0.27) indicating that warmer summers lower the Q min while warmer winters contributed to lower Qmin during the summers.

### Figures

1. Figure S1 Daily air temperature showing (A) Averages, (B) Maximum temperature and (C) Minimum temperatures from C7 Krycklan catchment from 1982 to 2022
2. Figure S2 The correlation between daily mean temperature from the Stensele meteorological station and the Svartberget meteorological station between 1982-2004 showing the r<sub>2</sub> and RMSE (root mean square error) between the two datasets
3. Figure S3 Annual air temperature showing the isolation of the winter period using the consecutive days below zero threshold. The winter period would be the area where the average temperature (blue line) falls below the 0 line (black).
4. Figure S4 Testing the effects of Autumn runoff and precipitation condition on mid-winter runoff using (A) Early winter runoff (average of Oct and Nov runoff) vs. mid-winter runoff (average Jan-Feb), (B) Autumn precipitation (seasonally adjusted precipitation using the method described in the methods) vs. mid-winter runoff (average Jan-Feb) and (C) Autumn precipitation (seasonally adjusted precipitation using the method described in the methods) vs. minimum winter runoff.
5. Figure S5 Variability in daily precipitation (A) and runoff (B) and the variability in annual values for precipitation (C) and runoff (D) in the Svartberget catchment. The pink shade represents the standard error in the dataset.
6. Figure S6 The extreme climate indices during the winter (purple) and summer (green) showed significant trends over the 30 years from 1992-2022. The standard error in each dataset is represented by the blue shades.
7. Figure S7 Regression of winter and summer variables (that showed significant trends) with the North Atlantic Oscillation Index (NAO) winter and summer indices. Data for NAO indices were obtained from the NAO website (<https://www.ncei.noaa.gov/access/monitoring/nao/>)

Table S1 Average annual temperature (T), Total precipitation (P mm yr<sup>-1</sup>) and Total runoff (Q mm yr<sup>-1</sup>) from the Krycklan catchment showing variability using standard deviation (std) and annual average minimum (Tmin) and maximum (Tmax) temperatures.

| Year | T    | P      | Q     | Tmin | Tmax | Std T | Std P | Std Q | Std Tmin | Std Tmax |
|------|------|--------|-------|------|------|-------|-------|-------|----------|----------|
| 1982 | 1.6  | 1018.5 | 387.6 |      |      | 8.7   | 39.5  | 1.4   |          |          |
| 1983 | 1.5  | 603.1  | 328.7 |      |      | 9.1   | 40.9  | 1.5   |          |          |
| 1984 | 1.8  | 600.9  | 317.8 |      |      | 9.2   | 24.2  | 1.6   |          |          |
| 1985 | -1.5 | 718.2  | 258.6 |      |      | 12.2  | 33.8  | 1.3   |          |          |
| 1986 | 0.9  | 685.3  | 353.5 |      |      | 10.1  | 45.9  | 1.8   |          |          |
| 1987 | -0.5 | 681.2  | 360.8 |      |      | 10.1  | 27.3  | 1.9   |          |          |
| 1988 | 0.9  | 588    | 371.5 |      |      | 9.7   | 63.7  | 1.5   |          |          |
| 1989 | 3    | 553.5  | 398.1 |      |      | 7.8   | 36.3  | 2.2   |          |          |
| 1990 | 2.2  | 634.7  | 282.7 |      |      | 7.4   | 24.4  | 1.7   |          |          |
| 1991 | 1.9  | 536.8  | 305.5 | -2.9 | 6    | 8.5   | 27.6  | 1.3   | 7.3      | 6.6      |
| 1992 | 2.3  | 648.8  | 273.5 | -2.8 | 6.5  | 7.8   | 29.8  | 1     | 4.8      | 4.1      |
| 1993 | 1.6  | 710.6  | 260   | -3.3 | 5.8  | 7.5   | 29.7  | 1.2   | 5.5      | 4.7      |
| 1994 | 1.2  | 446.1  | 427.3 | -4.1 | 6    | 9.8   | 41    | 1.8   | 7.9      | 6.5      |
| 1995 | 1.9  | 549.5  | 267.7 | -3.2 | 6.2  | 8.6   | 55.5  | 1.7   | 5.8      | 4.0      |
| 1996 | 1.2  | 553.3  | 297.1 | -4   | 5.9  | 9.3   | 9.1   | 2     | 7.0      | 5.6      |
| 1997 | 2.5  | 513.7  | 130.6 | -2.7 | 6.9  | 8.9   | 40.4  | 0.5   | 6.5      | 5.4      |
| 1998 | 1.5  | 846.8  | 216.8 | -3.1 | 5.6  | 8.4   | 44.6  | 1.6   | 7.3      | 5.2      |
| 1999 | 2.2  | 549.1  | 507.5 | -2.8 | 7    | 9.2   | 33.4  | 2     | 7.7      | 6.1      |
| 2000 | 3.3  | 827.5  | 253.2 | -1.7 | 7.7  | 7.7   | 39.8  | 1.3   | 6.4      | 5.3      |
| 2001 | 1.8  | 824.9  | 588.9 | -3.4 | 6.6  | 9.5   | 38.7  | 1.8   | 8.0      | 6.7      |
| 2002 | 2.5  | 470    | 534.3 | -3.2 | 7.4  | 10.1  | 28.7  | 2.2   | 8.1      | 6.5      |
| 2003 | 2.5  | 597.4  | 225.5 | -3.1 | 7.7  | 9.4   | 18.3  | 1.2   | 7.9      | 7.5      |
| 2004 | 2.2  | 643.5  | 246.5 | -2.8 | 6.7  | 8.5   | 27.2  | 1.1   | 7.0      | 5.9      |
| 2005 | 2.9  | 581.2  | 346.1 | -2.4 | 7.6  | 8.4   | 19.7  | 1.2   | 6.4      | 4.7      |
| 2006 | 3.1  | 628.1  | 248.7 | -2   | 7.7  | 9.3   | 25.3  | 0.8   | 6.6      | 5.2      |
| 2007 | 2.8  | 562.5  | 291   | -2.6 | 7.5  | 8.7   | 18.9  | 1.2   | 7.5      | 5.8      |
| 2008 | 2.9  | 658.6  | 259.3 | -2   | 7    | 7.1   | 29.7  | 0.8   | 5.2      | 3.1      |
| 2009 | 2.1  | 665.7  | 345.4 | -2.4 | 6.3  | 9.3   | 27.5  | 1.6   | 6.7      | 5.0      |
| 2010 | 0.6  | 612.5  | 327   | -4.2 | 4.8  | 11    | 27.6  | 1.4   | 7.3      | 6.3      |
| 2011 | 3.6  | 645.6  | 285.9 | -1.2 | 7.8  | 9.2   | 19.8  | 1.3   | 6.9      | 6.5      |
| 2012 | 2    | 828.9  | 263.3 | -2.7 | 5.4  | 8.5   | 44.8  | 0.9   | 6.6      | 5.6      |
| 2013 | 3.2  | 647.2  | 483.8 | -1   | 8.6  | 9     | 23.8  | 1.7   | 6.8      | 4.7      |
| 2014 | 3.7  | 583.5  | 293.1 | -0.8 | 7.7  | 8.3   | 16.7  | 1.2   | 6.3      | 5.6      |
| 2015 | 3.6  | 680.4  | 278   | -0.7 | 7.8  | 7.1   | 28.4  | 0.9   | 5.5      | 4.5      |
| 2016 | 2.6  | 609.9  | 325.2 | -2.1 | 7.1  | 8.9   | 26.7  | 1.2   | 7.2      | 6.2      |
| 2017 | 2.3  | 731.6  | 262.9 | -2.1 | 6.7  | 7.7   | 27.4  | 1.2   | 6.0      | 5.1      |
| 2018 | 2.9  | 543.7  | 304.5 | -2.4 | 7.9  | 10.1  | 35.2  | 1.3   | 6.1      | 5.0      |
| 2019 | 2.3  | 616.7  | 241.8 | -2.6 | 7.2  | 8.9   | 28    | 1.5   | 7.5      | 6.9      |
| 2020 | 4.1  | 794.9  | 234.6 | -0.5 | 8.8  | 7.3   | 32.6  | 1.3   | 4.9      | 3.8      |
| 2021 | 2.2  | 764.8  | 392.9 | -2.5 | 6.9  | 9.7   | 34.7  | 1.5   | 7.0      | 5.3      |
| 2022 | 3.2  | 639.3  | 429.8 | -1.7 | 8    | 8.6   | 15    | 1.5   | 6.1      | 5.6      |

Table S2 Table showing the coefficient of determination ( $r^2$ ) between climate extreme indices and winter minimum Q (W\_Qmin) and Summer minimum Q (S\_Qmin). For the winter Qmin, we can see that AFDD had the highest  $r^2$  (0.63) as identified by the stepwise linear regression model. For the summer Qmin, the strongest  $r^2$  can be seen with summer max temperature MaxTMax (-0.56) and winter AFDD<0 (0.27) indicating that warmer summers lower the Q min while warmer winters contributed to lower Qmin during the summers.

| Significant climate extreme indices | $r^2$  |        |
|-------------------------------------|--------|--------|
|                                     | W_Qmin | S_Qmin |
| <b>Winter</b>                       |        |        |
| AFDD <0                             | 0.63   | 0.27   |
| Frost days                          | -0.39  | 0.21   |
| Diurnal temp. range                 | 0.45   | -0.13  |
| Cold spells                         | -0.39  | -0.02  |
| Cool nights                         | -0.45  | 0.03   |
| Snow days                           | -0.03  | 0.13   |
| <b>Summer</b>                       |        |        |
| MaxTMax                             |        | -0.56  |
| Cool nights                         |        | -0.2   |
| Growing season length               |        | 0.01   |

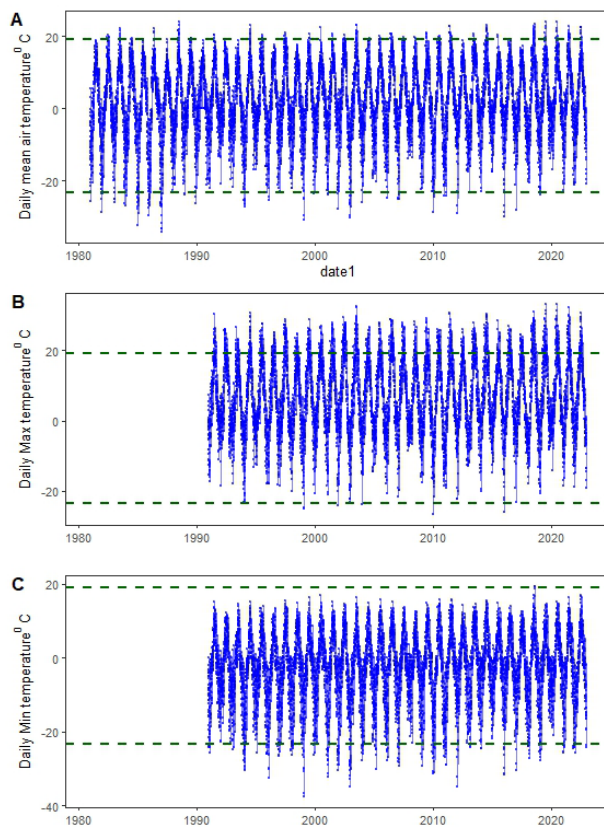

Figure S8 Daily air temperature showing (A) Averages, (B) Maximum temperature and (C) Minimum temperatures from C7 Krycklan catchment from 1982 to 2022 using the

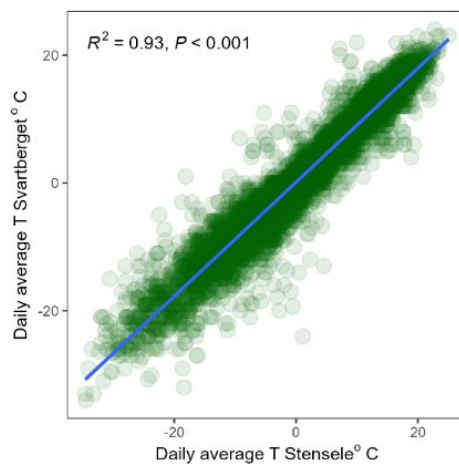

Figure S9 The correlation between daily mean temperature from the Stensele meteorological station and the Svartberget meteorological station between 1982-2004 showing the  $r^2$  and RMSE (root mean square error) between the two datasets

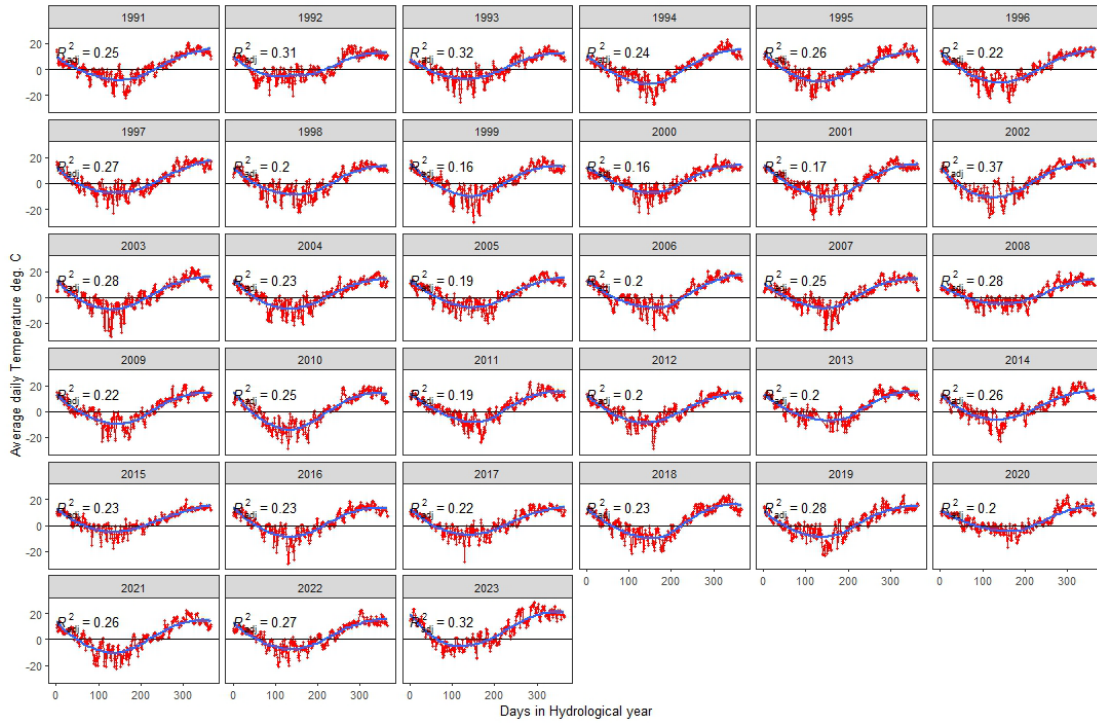

60 Figure S10 Annual air temperature showing the isolation of the winter period using the consecutive days below zero threshold. The winter period would be the area where the average temperature (blue line) falls below the 0 line (black).

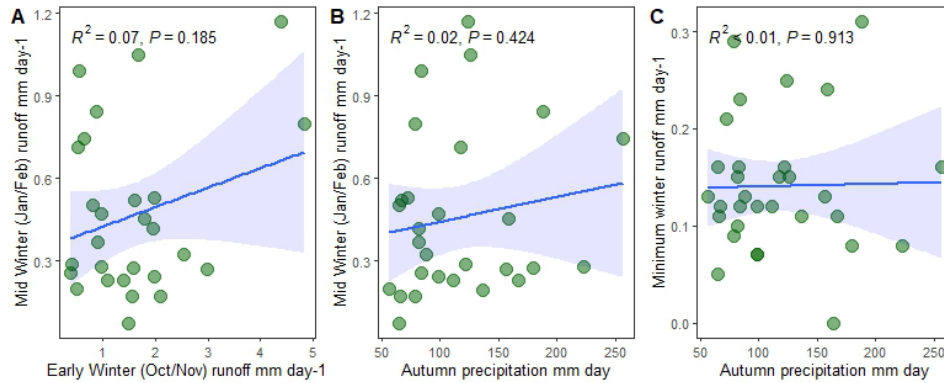

65 Figure S11 Testing the effects of Autumn runoff and precipitation condition on mid-winter runoff using (A) Early winter runoff (average of Oct and Nov runoff) vs. mid-winter runoff (average Jan-Feb), (B) Autumn precipitation (seasonally adjusted precipitation using the method described in the methods) vs. mid-winter runoff (average Jan-Feb) and (C) Autumn precipitation (seasonally adjusted precipitation using the method described in the methods) vs. minimum winter runoff.

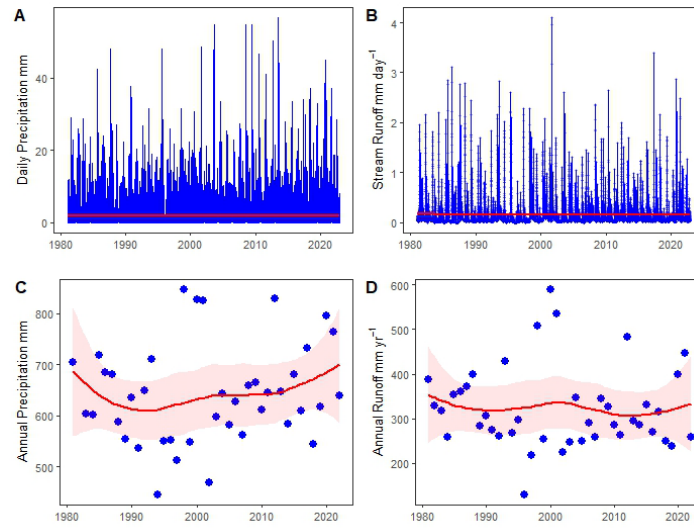

70 Figure S12 Variability in daily precipitation (A) and runoff (B) and the variability in annual values for precipitation (C) and runoff (D) in the Svartberget catchment. The pink shade represents the standard error in the dataset.

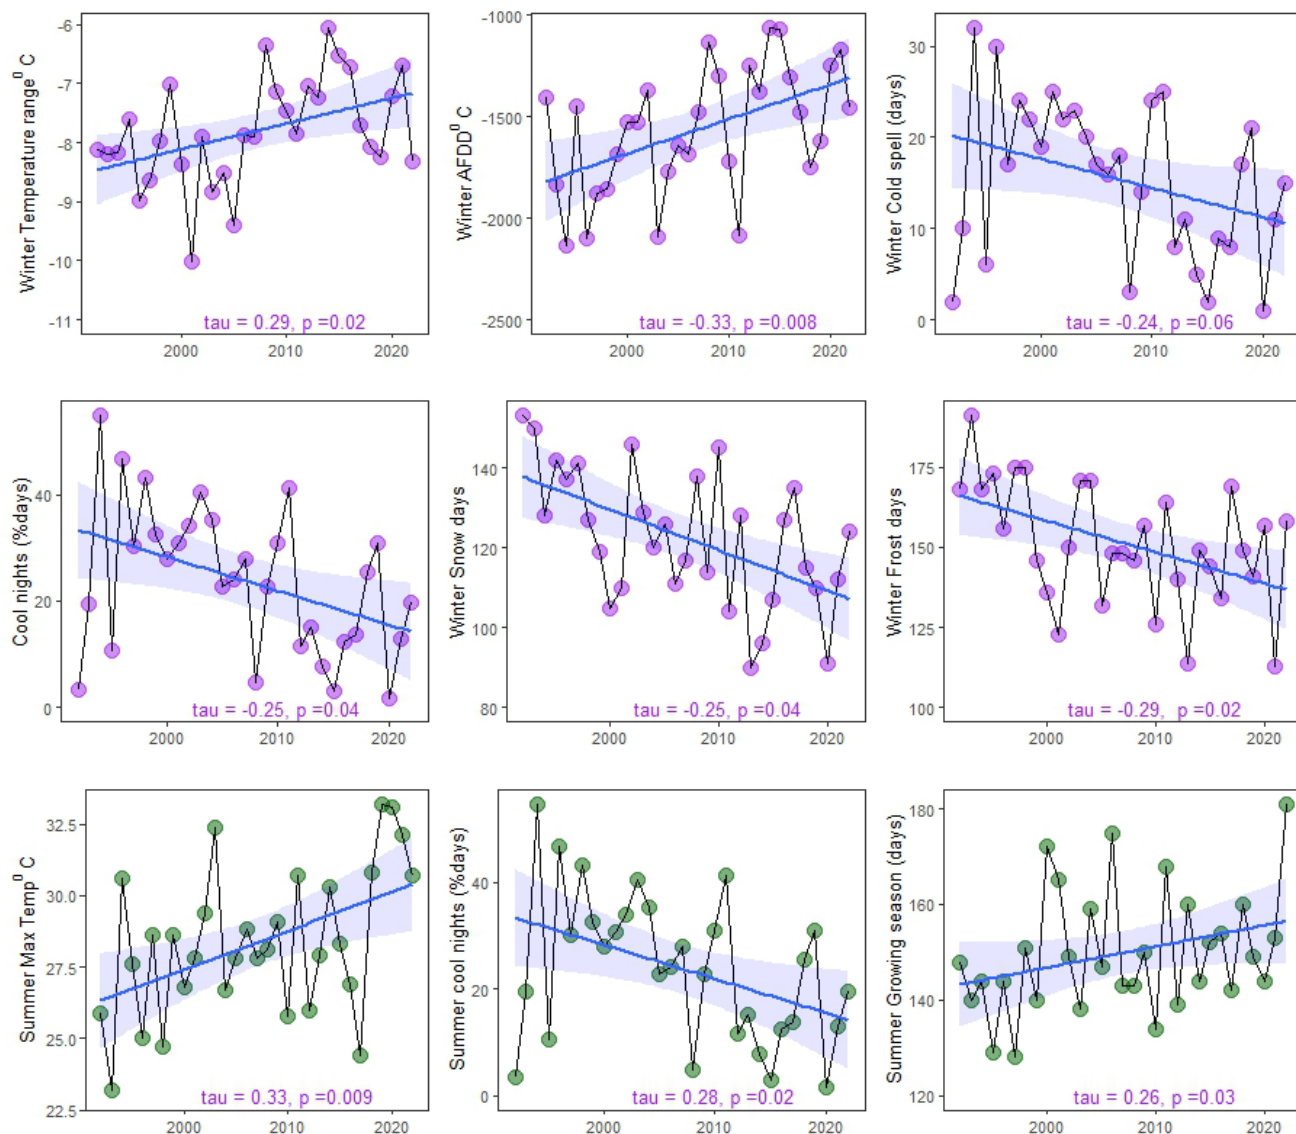

Figure S13 The extreme climate indices during the winter (purple) and summer (green) showed significant trends ( $p < 0.05$ ) over the 30 years from 1992-2022 and the trend value using the Mann Kendal trends test ( $\tau$ ). The standard error in each dataset is represented by the blue shades.



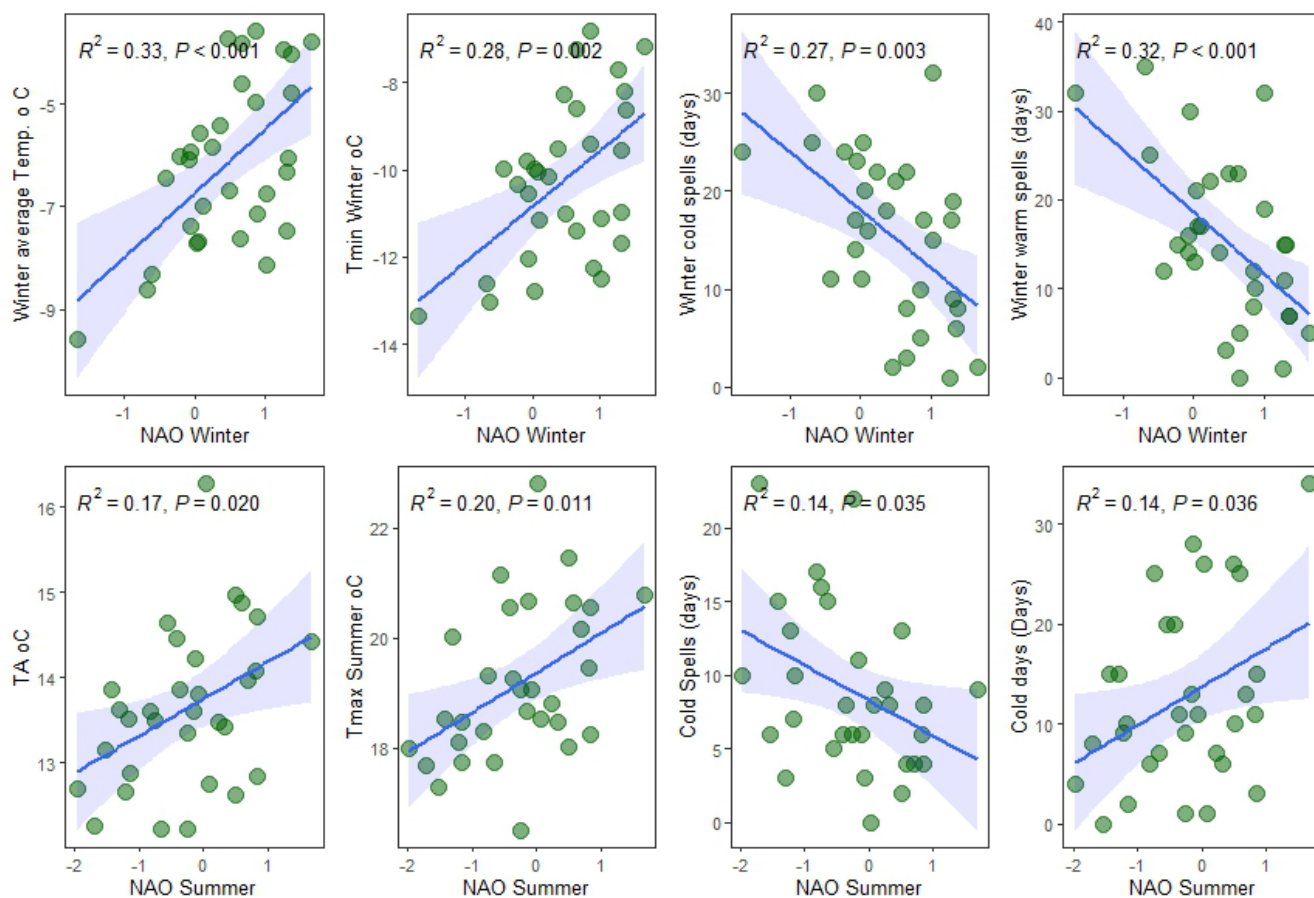

Figure S14 Regression of winter and summer variables (that showed significant trends) with the North Atlantic Oscillation Index (NAO) winter and summer indices. Data for NAO indices were obtained from the NAO website (<https://www.ncei.noaa.gov/access/monitoring/nao/>)
